# Supplementary material for: Laser irradiation-induced construction of Pt/Ag bimetallic nanourchins with improved electrocatalytic properties
Source: Royal Society of Chemistry journal article supplement (doi:10.1039/c7ra09242c), 2017-01-01
Supplement: c7ra09242c1.pdf [file c7ra09242c1.pdf]

## Supplementary Material

### Laser irradiation-induced construction of Pt/Ag bimetallic nanourchins with improved electrocatalytic properties

Hua Zhang,<sup>a</sup> Ming Chen,<sup>\*a</sup> Linlin Xu,<sup>a</sup> Wanda Hou,<sup>a</sup> Xiangdong Liu<sup>\*a</sup> and Feng Chen<sup>\*a</sup>

<sup>a</sup>*School of Physics and State Key Laboratory of Crystal Materials, Shandong University,  
Jinan 250100, China*

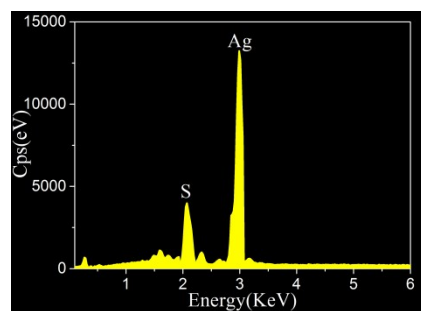

**Figure S1.** The EDS of the original Ag<sub>2</sub>S/Ag nanoseeds.

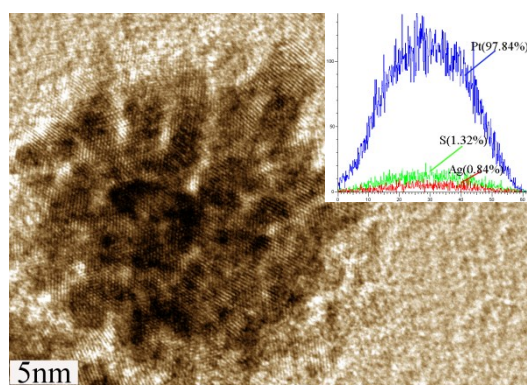

**Figure S2.** The HRTEM image of intermediate product in the process of fabricating Ag/Pt bimetallic nanourchins and the inset is the cross-sectional compositional line profiles.

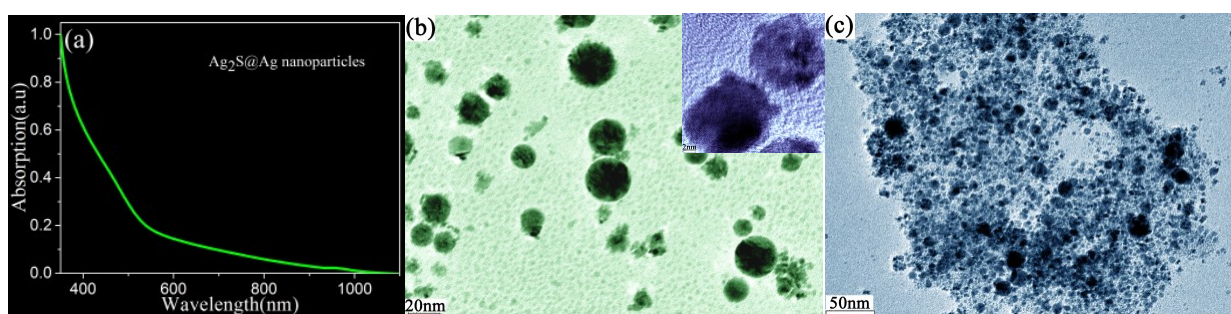

**Figure S3.** (a) The UV-visible absorption spectra of  $\text{Ag}_2\text{S}/\text{Ag}$  nanoparticles by laser ablation of Ag target in TAA solution. (b) TEM image of Pt/Ag nanocomposites fabricated by 1064 nm laser irradiation in solution. (c) TEM image of Pt/Ag nanocomposites fabricated by 532 nm (600 mW) laser irradiation in solution.

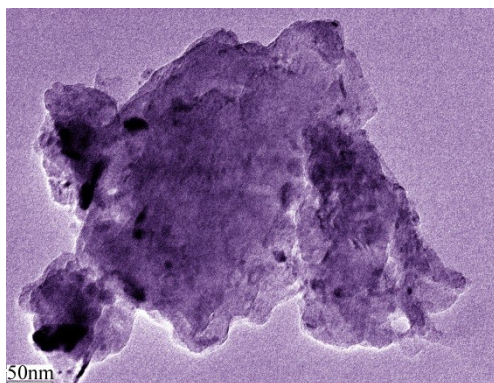

**Figure S4.** The TEM image of product we obtained without any laser beam irradiation.

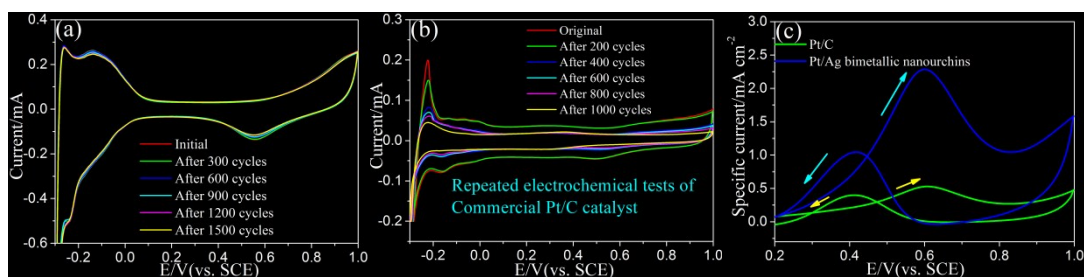

**Figure S5.** (a) The CV profiles of the Pt/Ag bimetallic nanourchins during the durability tests. (b) The CV profiles of the commercial Pt/C catalyst during the durability tests. (c) ECSA-normalized CV curves for the Pt/Ag bimetallic nanourchins and commercial Pt/C in 0.5 M methanol and 0.5 M  $\text{H}_2\text{SO}_4$ .

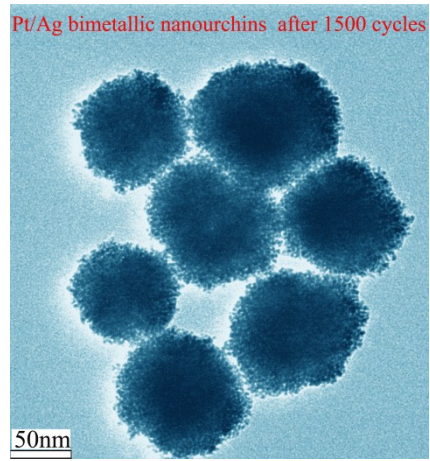

**Figure S6.** TEM image of the Pt/Ag bimetallic nanourchins after 1500 repeated CV tests.
